# Supplementary material for: Adaptation Strategies of South American Farmers to Climate Change: A Systematic Review
Source: Research Square preprint supplement (doi:10.21203/rs.3.rs-8413236/v1), 2026-01-08
Supplement: Supplementary file 1 [file 324b195cf5d4dc67694f1986.docx]

**Electronic Supplementary Material**

Figure 1A. Published research by country and year


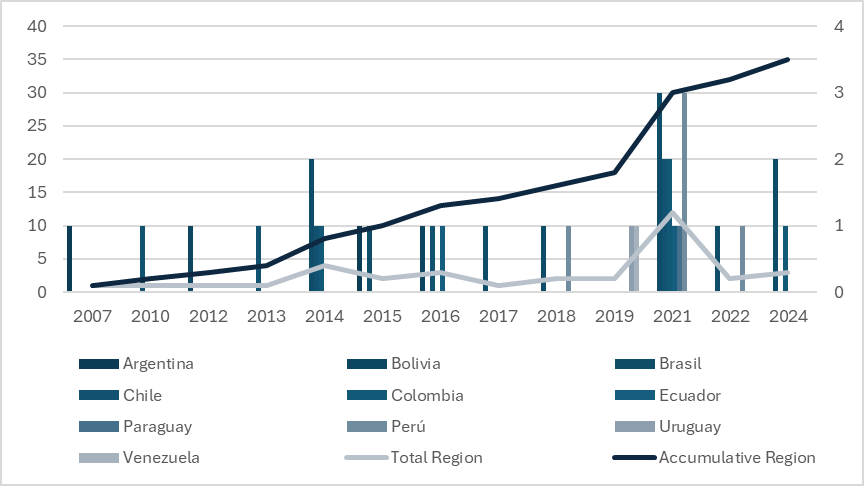


Table 1A. Research output of South American countries

| Rank | Country | Documents | Citable documents | Citations |
| --- | --- | --- | --- | --- |
| 1 | Brazil | 36.295 | 35.769 | 390.825 |
| 3 | Colombia | 6.102 | 5.959 | 49.184 |
| 4 | Argentina | 4.785 | 4.713 | 90.769 |
| 5 | Chile | 4.603 | 4.451 | 83.602 |
| 6 | Peru | 2.268 | 2.240 | 17.917 |
| 7 | Venezuela | 1.702 | 1.680 | 14.912 |
| 9 | Ecuador | 1.443 | 1.422 | 18.103 |
| 11 | Uruguay | 655 | 626 | 12.591 |
| 14 | Bolivia | 201 | 196 | 4.380 |
| 17 | Paraguay | 83 | 82 | 1.198 |
| 23 | French Guiana | 48 | 48 | 2.325 |
| 29 | Guyana | 24 | 22 | 430 |
| 34 | Suriname | 16 | 15 | 828 |

Table 2A. South American countries’ vulnerability position according to the ND-GAIN Country Index

| Country | Overall vulnerability rank | | Food score rank | |
| --- | --- | --- | --- | --- |
| **Rank** | **Score** | **Rank** | **Score** |
| Chile | 28 | 0.334 | 15 | 0.238 |
| Brazil | 49 | 0.363 | 46 | 0.358 |
| Argentina | 59 | 0.372 | 52 | 0.369 |
| Venezuela | 61 | 0.374 | 58 | 0.392 |
| Paraguay | 75 | 0.391 | 65 | 0.406 |
| Uruguay | 75 | 0.391 | 72 | 0.419 |
| Colombia | 81 | 0.403 | 84 | 0.444 |
| Peru | 83 | 0.406 | 85 | 0.450 |
| Bolivia | 111 | 0.447 | 86 | 0.452 |
| Ecuador | 125 | 0.465 | 97 | 0.466 |

Source: https://gain.nd.edu/our-work/country-index/rankings/

Table 3A. South American countries’ rural population, rural employment and share of agricultural GDP

| Country | Most Recent Year of measurement | % rural population | % rural employment | % of Agriculture on GDP |
| --- | --- | --- | --- | --- |
| Argentina | 2023 | 8 | 1 | 5,9 |
| Bolivia | 2023 | 29 | 24 | 13,5 |
| Brazil | 2023 | 12 | 8 | 6,2 |
| Chile | 2023 | 12 | 6 | 3,5 |
| Colombia | 2023 | 18 | 14 | 8,7 |
| Ecuador | 2023 | 35 | 30 | 7,7 |
| Paraguay | 2023 | 37 | 17 | 7,2 |
| Peru | 2023 | 21 | 24 | 11,3 |
| Uruguay | 2023 | 4 | 9 | 5,6 |
| Venezuela | 2023 | 12 | 11 | s/i |

Source: https://data.worldbank.org/indicator/SL.AGR.EMPL.ZS?end=2023&locations=AR-UY-BO-BY-CL-EC-PE-BR-CO-VE&name_desc=false&start=2023&view=map
