# Supplementary material for: Adaptation Strategies of South American Farmers to Climate Change: A Systematic Review
Source: Research Square preprint supplement (doi:10.21203/rs.3.rs-8413236/v1), 2026-01-08
Supplement: Supplementary file 2 [file 7f7e707afb3ebba527bf4856.xlsx]

## Sheet: Articles_Database
Code	Title	Year of Publication	Author(s)	Short Citation	Journal	Search Date	Country	Abstract
#S1	Climate Adaptation and Conservation Agriculture among Peruvian Farmers	2021	Tambet, H & Stopnitzky, Y	Tambet & Stopnitzky, 2021	American Journal of Agricultural Economics	2024-08-27	Peru	Peruvian agriculture will likely experience serious economic impacts of climate change, with changing rainfall and temperature patterns forcing farmers to confront abnormal climate conditions. In this context we study the impact of climate shocks on the agricultural practices of farmers who grow two main staples: maize and potato. We focus on four types of agricultural techniques: (a) those that …
#S2	Crop farming adaptation to droughts in small-scale dryland agriculture in Chile	2021	Zúñiga, F.; Jaime, M.; Salazar, C	Zúñiga et al., 2021	Water Resources and Economics	2024-08-27	Chile	Small-scale agriculture is one of the fundamental economic sectors in Chile. An increased frequency and intensity of extreme weather events due to climate change suggest a higher weather risk for the future, with potential consequences for crop choices. These effects are expected to be greater in dryland areas, where producers are more vulnerable to shocks and, therefore, less able to protect the…
#S3	Representations of Colombian Andean farmers on climate change and mitigation and adaptation strategies	2021	Rodríguez, J. de J. N.; Rodríguez, J. C. C.; Carrero, D. M.; Novoa, L. L. R.; Frank, J. V. S.	Rodríguez et al., 2021	Revista de Economia e Sociologia Rural	2024-08-27	Colombia	This article presents the findings of research conducted in a rural community located in Norte de Santander Department, Colombia, on farmers' representations of the impacts of climate change. The analysis of the behavior of temperature and average rainfall in the period 1985-2015 was put together concerning the local knowledge of the farmers. The approach was developed through 56 multiple choice …
#S4	New Insights on Land Use, Land Cover, and Climate Change in Human–Environment Dynamics of the Equatorial Andes	2021	López, S.; López-Sandoval, M. F.; Jung, J.-K.	López et al., 2021	Annals of the American Association of Geographers	2024-08-28	Ecuador	We provide new insights on land use and climate change in human–environment dynamics of the equatorial Andes. We focused on two provinces (Cotopaxi and Napo) and three communities of Ecuador characterized by similar land tenure regimes but different socioenvironmental contexts. We integrate satellite data classifications and statistical analyses, longitudinal downscaled climate modeling, and inte…
#S5	Farmers’ Options to Address Water Scarcity in a Changing Climate: Case Studies from two Basins in Mediterranean Chile	2016	Roco, L.; Poblete, D.; Meza, F.; Kerrigan, G.	Roco et al., 2016	Environmental Management	2024-08-28	Chile	Irrigated agriculture in Mediterranean areas faces tremendous challenges because of its exposure to hydroclimatic variability, increasing competition for water from different sectors, and the possibility of a climatic change. In this context, efficient management of water resources emerges as a critical issue. This requires the adoption of technological innovations, investment in infrastructure, …
#S6	Adaptation to climate variability among the coffee farmers of the watersheds of the rivers Porce and Chinchiná, Colombia	2014	Turbay, S.; Nates, B.; Jaramillo, F.; Vélez, J.J.; Ocampo, O.L.	Turbay et al., 2014	Investigaciones Geograficas	2024-08-29	Colombia	This article seeks to explain the practices used by small farmers to cope with climate variability and extreme weather events in the basins of the Chinchiná and Porce rivers located on the central Andes in Colombia. The information wasglacie collected through interviews, observations on farms and workshops with farmers. Additionally historical averages on temperature, precipitation and sunshine w…
#S7	Accessing adaptation: Multiple stressors on livelihoods in the Bolivian highlands under a changing climate	2012	Mcdowell, J & Hess, J.	McDowell y Hess, 2012	Global Environmental Change	2024-08-28	Bolivia	Smallholder farmers continuously confront multiple social and environmental stressors that necessitate changes in livelihood strategies to prevent damages and take advantage of new opportunities, or adaptation. Vulnerability, meaning susceptibility to harm, is attributable to social determinants that limit access to assets, leading to greater exposure and sensitivity to stressors and a limited ca…
#S8	Climatic and socio-economic risks perceptions and adaptation strategies among livestock family farmers in the Pampa biome	2015	Litre, G & Bursztyn, M.	Litre y Bursztyn, 2015	Ambiente e Sociedade	2024-10-20	Argentina, Brazil & Uruguay	In the context of the crisis of industrial modernity, adaptive capacity to new climatic and social-economic risks depends on the study of the perceptions and understanding that the involved actors have of those risks. Through interviews with family farmers from Argentina, Brazil and Uruguay, this paper describes how they perceive and respond to social-economic and climatic risks. Results confirm …
#W1	Climate Change Perceptions and Adaptation Strategies: A Mixed Methods Study with Subsistence Farmers in Rural Peru	2022	Landaverde, R; Rodriguez, MT; Niewoehner-Green, J; Kitchel, T; Chuquillanqui, J	Landaverde et al., 2022	Sustainability	2024-08-29	Peru	In Peru, subsistence farmers experience firsthand the direct and indirect impacts of climate change (CC). To understand how farmers adapt their livelihoods to climatic variability, this mixed methods study explored their perceptions and climate adaptability strategies implemented in Huayhuay, Peru. Twenty farmers participated in semi-structured interviews, and 103 completed a survey questionnaire…
#G1	Practices and Strategies for Adaptation to Climate Variability in Family Farming. An Analysis of Cases of Rural Communities in the Andes Mountains of Colombia and Chile	2021	Marchant, C.; Rodríguez, P.; Morales-Salinas, L.; Paz Betancourt, L.; Ortega Fernández, L.	Marchant et al., 2021	Agriculture	2024-09-02	Chile & Colombia	Climate variability imposes greater challenges on family farming and especially on rural communities in vulnerable mountainous regions such as the Andes in Latin America. Changes in rainfall patterns and fluctuations in temperatures cause a greater frequency of extreme events, increased pests, and crop diseases, which even lead to food insecurity in communities that depend on self-production for …
#G2	Farm level adaptation decisions to face climatic change and variability: Evidence from Central Chile	2014	Roco, L.; Engler, A.; Bravo-Ureta, B.; Jara-Rojas, R.	Roco et al., 2014	Environmental Science & Policy	2024-09-02	Chile	Climate change represents one of the biggest threats to agriculture today. The aim of this paper is to analyze the decision and intensity of adaptation to this phenomenon among farmers in Central Chile and to identify the factors that influence the adoption of adaptation measures. The list of adaptation practices was created with the assistance of a panel of experts. A two-part hurdle model was u…
#G3	Climate change and farm-level adaptation: the Brazilian Sertão	2018	Maia, A.; Cesano, D.; Miyamoto, B. C. B.; Eusebio, G. S.; Silva, P. A. de O.	Maia et al., 2018	International Journal of Climate Change Strategies and Management	2024-09-03	Brazil	Purpose – The Sertão, located in the Northeastern region of Brazil, is the most populous semi-arid region in the world. The region also faces the highest rates of poverty, food insecurity and climate risks in this country. Basic economic activities, such as extensive livestock and dairy farming, tend to be mainly affected by the increasing temperatures and recurrent droughts taking place in the p…
#G4	Climate Change and Agriculture: Subsistence Farmers’ Response to Extreme Heat	2021	Aragón, F. M.; Oteiza, F.; Rud, J. P.	Aragón et al., 2021	American Economic Journal: Economic Policy	2024-09-03	Peru	This paper examines how subsistence farmers respond to extreme heat. Using microdata from Peruvian households, we find that high temperatures reduce agricultural productivity, increase area planted, and change crop mix. These findings are consistent with farmers using input adjustments as a short-term mechanism to attenuate the effect of extreme heat on output. This response seems to complement o…
#G5	Adaptation in Viticulture: A Case of Study of Producers in the Maule Region of Chile	2010	Hadarits, M. Smit, B. Diaz, H.	Hadarits et al., 2010	Journal of Wine Research	2024-10-07	Chile	Climate change may pose challenges as well as opportunities for viticulture, and much research has been devoted to assessing the impacts of climate change on quality wine grape production, focusing primarily on the capability of current wine-producing areas to ripen wine grapes under future increases in temperatures. This paper considers the human dimensions of the climate change and viticulture …
#G6	Perceptions and Adaptation to Climate Change: the Case of Peruvian Farmers	2021	Useche, P. Anglade, B. Muriel, J. Twyman, J.	Useche et al., 2021	Journal of Economic and Development Studies	2024-10-07	Peru	Rice cultivation in Peru exemplifies the complex nature of the interaction between changing climatic conditions and households’ decisions on how to cope with these changes in the face of multiple constraints. In this study, we examine how climatic conditions affect these decisions. We account for the fact that this relationship is mediated by the perceptions that individuals have about climatic c…
#G7	Local Perceptions, Vulnerability and Adaptative Responses to Climate Change and Variability in a Winegrowing Region in Uruguay	2019	Fourment, M. Milka Ferrer. Gérard Barbeau. Hervé Quénol.	Fourment et al., 2019	Environmental Management	2024-10-07	Uruguay	Understanding climate variability in a winegrowing region is fundamental to understanding how its vineyards can adapt to climate change. For Uruguay, studying the vulnerability and adaptive responses of vineyards to climate change and climate variability is relevant due to its winegrowing region’s economic importance and cultural heritage. Winegrowers and technical advisors were interviewed to ev…
#G8	Estrategias de adaptación a la dinámica climática en el ámbito rural de la Pampa argentina	2007	Pereira, S. Maldonado, G. Natenzon, C.	Pereira et al., 2007		2024-10-09	Argentina
#G9	Percepciones y Estrategias de los Campesinos del Secano para Mitigar el Deterioro Ambiental y los Efectos del Cambio Climático en Chile	2013	Infante, A. Infante, F.	Infante e Infante, 2013	Agroecología	2024-10-09	Chile	Este estudio presenta, por un lado, una serie de problemáticas ecológicas y socioeconómicas que afectan directamente a las familias campesinas que habitan la zona denominada “Secano Interior” de la Región del Biobío, Chile. Estas problemáticas son diversas tanto en su proceden-cia como en su naturaleza, es por esta misma razón es que para este estudio se propone una metodología y enfoque interdis…
#G10	Cambio climático y agricultura de pequeña escala en los Andes ecuatorianos: un estudio sobre percepciones locales y estrategias de adaptación.	2016	Herrador-Valencia, D. Paredes, M.	Herrador-Valencia & Paredes, 2016	University of Texas Press	2024-10-09	Ecuador	Los Andes tropicales han sido declarados como una de las regiones más vulnerabl cambio climático. Procesos de reducción e incluso de desaparición de glaciares, así pronunciados cambios en los patrones lluvia están actualmente afectando a la reg Nuestro trabajo ha sido desarrollado en la zona norte de la Sierra andina del Ecuad dos diferentes pisos ecológicos, Bosque seco premontano y Bosque muy h…
#G11	Percepción de riesgo a la variabilidad climática y adaptación de productores agrícolas en Paraguay	2021	Giménez, F.	Giménez, 2021		2024-10-09	Paraguay	Dentro de este trabajo se aborda la percepción de los productores de una de las principaleszonas productivas del Paraguay, ante los riesgos que representan la variabilidad climática, ycómo esa percepción supone la adopción de medidas de adaptación para enfrentarsealosimpactos del clima en el sistema productivo. El área de estudio fue el DepartamentodeSanPedro, se tomaron dos casos de estudio, la …
#G12	Farmers' perceptions and adaptation strategies to climate change in Minas Gerais State, Brazil	2014	Pires, M. Cunha, D. Reis, D. Coelho, A.	Pires et al., 2014	Journal of Agricultural Sciences	2024-10-20	Brazil	This article aimed to investigate the perception of rural producers in Minas Gerais regarding climate change and the adoption of adaptive strategies. Data were collected for the analysis through a semi-structured questionnaire, applied during the 83rd Farmers' Week (UFV), which took place in 2012. The questionnaire contained questions about the general characteristics of agricultural properties, …
#G13	Agricultura familiar y la adaptación al cambio climático en COAPROCOR - Paraná, Brasil.	2021	Gallardo, O.	Gallardo, 2021		2024-10-20	Brazil	La agricultura familiar es sensible al cambio climático debido a su baja capacidad de invertir en la prevención ante los efectos de la variabilidad climática y la recuperación después de eventos meteorológicos extremos. Es necesario estudiar la temática, debido a que el clima es la principal fuente de riesgo en la agricultura, desde sus inicios como actividad humana. La investigación sobre este t…
#G14	Adaptive Management Strategies of Local Communities in Two Amazonian Floodplain Ecosystems in the Face of Extreme Climate Events	2021	Da Cunha, J. Clement, C. Braga, A. Ticktin, T. Steward, A.	Da Cunha et al., 2021	Journal of Ethnobiology	2024-10-20	Brazil	In Amazonia, changes in the frequency and intensity of extreme climate events are occurring and expected to intensify, affecting food security with subsequent social and political problems. We conducted semi-structured interviews in communities of the mid-Solimões River basin (Amazonas, Brazil). Our questions were designed to construct seasonal calendars with residents (ribeirinhos) to understand…
#G15	Climate Change and Its Impact on the Agricultural Calendar of Riverine Farmers in Médio Juruá, Amazonas State, Brazil	2022	Vasconcelos, M.A.; Veiga, J.A.P.; Silva, J.L.G.; Guimarães, D.F.; Brito, A.L.; Santos, Y.L.F.; Lopes, M.; Lima, A.L.; Oliveira, E.T.	Vasconcelos et al., 2022	Atmosphere	2024-10-20	Brazil	The labor relationship developed by the Amazonian riverside dwellers is weakened due to changes in temperature, the flood pulse, the ebb tide of the rivers, and precipitation. In this context, this research aimed to evaluate the impacts of climate change on the socio-biodiversity chains in the region of Médio Juruá-Amazonas. Collections were carried out in two communities located in the Sustainab…
#G16	Perception and adaptation to climate change in vulnerable regions	2024	Jiménez, A. Fuentes, F. Paternina, R. Pinedo, J.	Jiménez et al., 2024	Global Journal of Environmental Science and Management	2024-10-20	Colombia	Understanding and implementing strategies to adapt to climate change is essential for maintaining the livelihoods and well-being of the human population. In Colombia, interest in climate change is increasing, reflected in growing attention towards adaptation and mitigation strategies. There is a lack of detailed research on this subject, especially in ecologically significant areas like the La Mo…
#G17	Adaptation Measures to Climate Change as Perceived by Smallholder Farmers in the Andes	2021	Ballesteros, J. Isaza, C.	Ballesteros e Isaza, 2021	Journal of Ethnobiology	2024-10-20	Colombia	Events related to the global effects of climate change (CC) have impacted smallholder farmers from developing countries more severely than any other group. This paper presents the case of Colombian Andean Altiplano farmers who are increasingly exposed to the impacts of a highly variable climate, yet have developed adaptation and coping strategies in their farms to reduce it. Semi-structured and s…
#E1	Archetypes of Climate Vulnerability: a Mixedmethod Approach Applied in the Peruvian Andes	2018	Merino, M. Sietz, D. Jost, F. Berger, U.	Merino et al., 2018	Climate and Development	2024-04-12	Peru	Farm household systems (FHSs) in the Andes handle climate-related hazards such as frost and droughts with risk-coping and risk-management strategies based on the adaptive capital available to them. Nevertheless, a higher frequency of climatic stressors observed during the last few decades is challenging their capacity to adapt at a pace fast enough to keep up with the changes in external conditio…
#E2	Vulnerabilidad de productores rurales de Mendoza ante el Cambio Ambiental Global: clima, agua, economía y sociedad	2015	Musseta, P. Barrientos, M.	Musseta y Barrientos, 2015	Revista de la Facultad de Ciencias Agrarias - UNCuyo	2024-04-12	Argentina	Este artículo aborda la vulnerabilidad a los fenómenos asociados al Cambio Ambiental Global (CAG) de los productores agrícolas de la cuenca del río Mendoza en Argentina. La vulnerabilidad es entendida como un fenómeno complejo que se genera en el cruce de las dimensiones ambientales, sociales y económicas. A partir de un estudio cualitativo basado en entrevistas en profundidad a productores del á…
#E3	Farmers' Perceptions of and Adaptations to Water Scarcity in Colombian and Venezuelan Páramos in the Context of Climate Change	2019	Leroy, D.	Leroy, 2019	International Mountain Society	2024-04-12	Colombia & Venezuela	This study examined how members of 2 water user associations in highelevation ecosystems in Colombia and Venezuela perceive water scarcity as well as the relationship between their perception of and adaptation to it. Among study participants, adaptation was guided not only by the perception of climate change (disturbance of the seasons, decrease in precipitation, and more extreme temperatures) bu…
#E4	Perceptions of Risks Related to Climate Change in Agroecosystems in a Semi‑arid Region of Brazil	2021	Megalhaes, H. Soares, I. de Lima, E. Albuquerque, P.	Megalhaes et al., 2021	Human Ecology	2024-04-12	Brazil	Small-scale farmers who depend on natural resources for subsistence in rural areas are especially vulnerable to climate change and may develop adaptive responses once they understand the nature of the risks and their consequences. We examine the efects of schooling, experience in agriculture, and the number and severity of risks perceived by farmers on the number and type of adaptive responses de…
#E5	Climate change and crop diversity: farmers’ perceptions and adaptation on the Bolivian Altiplano	2016	Meldrum, G.; Mijatovic´, D.; Rojas, W.; Flores, J.; Pinto, M.; Mamani, G.; Condori, E.; Hilaquita, D.; Gruberg, H.; Padulosi, S.	Meldrum et al., 2016	Environ Dev Sustain	2024-04-12	Bolivia	Crop diversity is central to traditional risk management practices on the Andean Altiplano and may find renewed importance in adapting to climate change. This study explored the role of crop diversity in farmers’ adaptation actions in eight Aymara communities on the northern Bolivian Altiplano. Using a combination of quantitative and qualitative methods, including multifactor analysis and a commu…
#EB1	PERCEPÇÃO E ESTRATÉGIAS DE ADAPTAÇÃO DE AGRICULTORES FAMILIARES FRENTE ÀS MUDANÇAS CLIMÁTICAS NO MUNICÍPIO DE BARREIRAS BAHIA	2024	Silva,K	Silva, K., 2024	Revista de Economia e Sociologia Rural (RESR)	2025-03-19	Brazil
#EB2	PERCEPÇÃO DOS PEQUENOS AGRICULTORES DA COMUNIDADE DE OITICICA, DONA INÊS-PB FRENTE ÀS MUDANÇAS CLIMÁTICAS	2017	Silva, A. C. O.; Alves, C. A. B.; Arruda, L. V.; Santos, A. C. F.; Silva, A. P. T.; Santos, H. N. F.; Silva, M. A. O.; Araújo, J. T. M.	Silva, et al., 2017		2025-03-19	Brazil
#EB3	As percepções sobre as variações e mudanças climáticas e as estratégias de adaptação dos agricultores familiares do Seridó potiguar	2014	Andrade, A; Silva, N; Souza, C	Andrade, et al., 2014	Desenvolvimento e Meio Ambiente	2025-03-19	Brazil	El cambio climático puede volver más escasos los recursos naturales en regiones semiáridas, afectando a las poblaciones agrícolas que dependen de ellos. El Seridó potiguar es una de estas regiones, donde los agricultores ya enfrentan dificultades debido a la ocurrencia de sequías y lluvias intensas. Este estudio analiza las percepciones de los agricultores sobre las variaciones climáticas y sus e…
#EB4	Vista do Percepção e adaptação de agricultores familiares às Mudanças Climáticas _ Segurança Alimentar e Nutricional	2024	Gabriel, C ; Souza-Esquerdo, V	Gabriel & Souza-Esquerdo., 2024	Segurança Alimentar e Nutricional	2025-03-19	Brazil
